# Supplementary material
Source: PubMed Central journal article supplement (PMC2223413)
Supplement: molcellb_28_2_551__1.pdf [file molcellb_28_2_551__1.pdf]

## Supplemental Materials

### Materials and methods

#### *Cycloheximide chase assay*

Cells expressing HA-tagged proteins were grown in indicated medium to OD<sub>600</sub> ~0.6.

Cycloheximide (50 µg/ml final concentration) was added to start the chase. Every 15 min, a 1 ml aliquot of the cell culture was withdrawn and total cellular proteins were prepared as described (1).

### Figures and figure legends

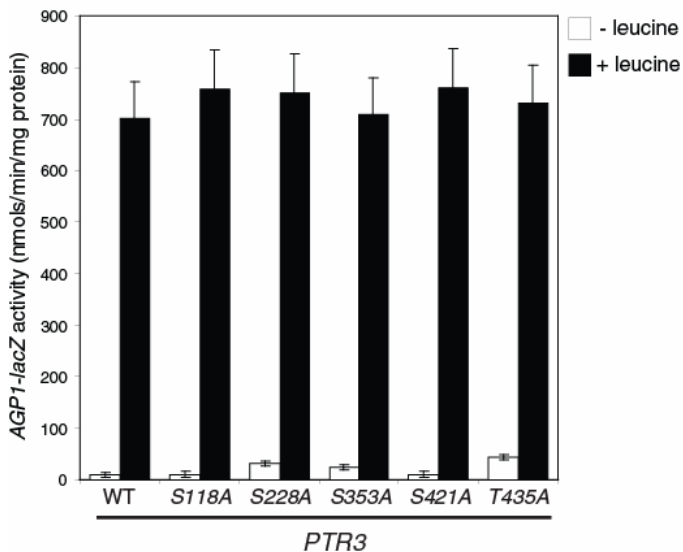

Figure S1. Mutations in five CKI consensus sites of *PTR3* do not significantly affect *AGP1-lacZ* reporter gene expression. *ptr3Δ* cells (strain ZLY1917) were transformed with plasmids carrying various *PTR3* constructs as indicated. Transformants were grown in SD medium with or without 0.02% leucine and β-galactosidase assays were conducted

as described in Materials and methods. Plasmids used: WT, pZL1949; *S118A*, pZL2157; *S228A*, pZL2147; *S353A*, pZL2265; *S421A*, pZL2261; *T435A*, pZL2269.

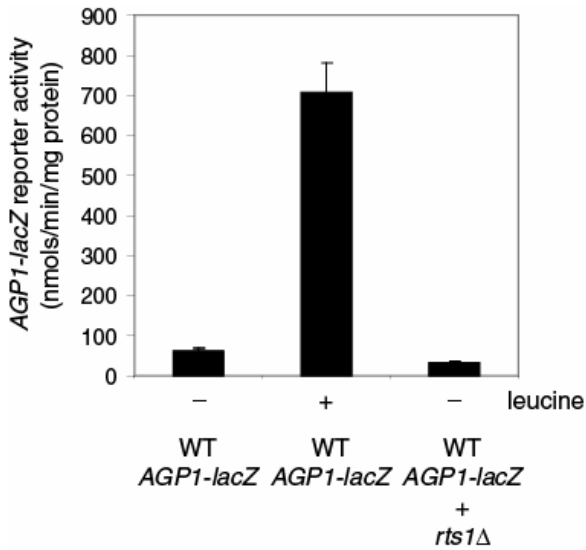

Figure S2. An *rts1Δ* mutation does not activate *AGP1-lacZ* expression in co-cultured wild type cells carrying an *AGP1-lacZ* reporter gene. Indicated cells were grown in SD medium with or without 0.02% leucine as indicated and  $\beta$ -galactosidase activities were determined as described. ZLY044, WT *AGP1-lacZ*; ZLY2535, *rts1Δ*. In the co-culture experiment, equal amount of ZLY044 and ZLY2525 cells were inoculated and grew to a combined OD of 0.6-0.7. Based on growth rates of independent cultures, the ratio of the amount of ZLY044 to ZLY2535 cells in the collected co-culture for  $\beta$ -galactosidase assay is 1:1 when grown in SD medium without leucine.

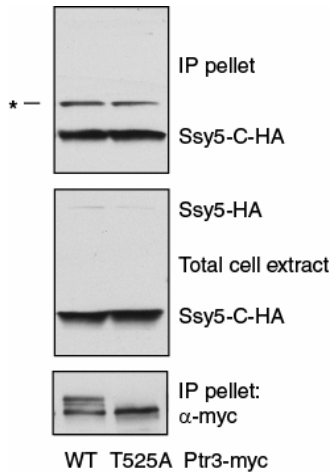

Figure S3. The threonine 525 to alanine mutation in Ptr3 does not affect its interaction with Ssy5-C. *ptr3Δ ssy5Δ* cells (RBY875) carrying centromeric plasmids expressing Ssy5-HA (pZL2340) and wild type Ptr3-myc (pZL1949) or the mutant Ptr3(T525A)-myc (pZL2122) were grown in SD medium with 0.02% leucine. Ptr3-myc and Ptr3(T525A)-myc were immunoprecipitated with anti-myc antibody and myc- and HA-tagged proteins were probed with anti-myc and anti-HA antibody, respectively. Ssy5 and Ssy5-C-HA indicate full-length and the C-terminal fragment of Ssy5. “\*” indicates the heavy chain of anti-myc antibody.

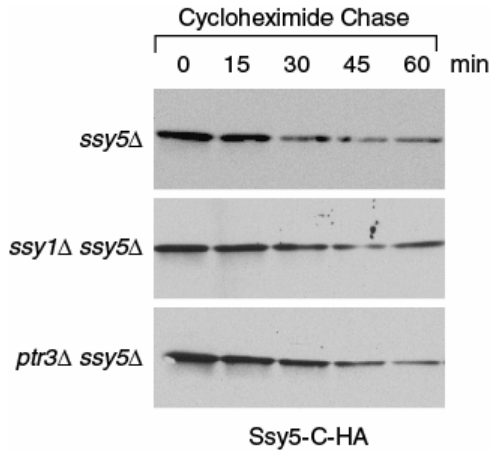

Figure S4. Mutations in *SSY1* and *PTR3* do not increase instability of Ssy5-C, the C-terminal fragment of Ssy5. *ssy5Δ* (RBY909), *ssy1Δ ssy5Δ* (RBY873), *ptr3Δ ssy5Δ* (RBY875) cells transformed with a centromeric plasmid expressing Ssy5-HA (pZL1668) were grown in SD medium with 0.02% leucine to mid-log phase. Stability of Ssy5-C-HA was examined by cycloheximide chase assay as described in Figure S1. Ssy5-C-HA was probed with anti-HA antibody.

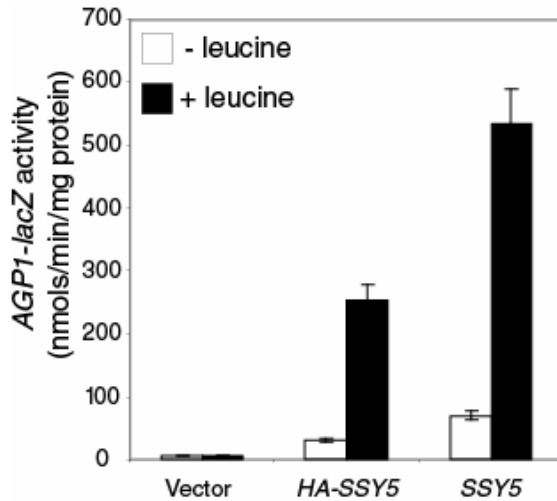

Figure S5. An N-terminal 6xHA tagged Ssy5 is not constitutively active. *ssy5* $\Delta$  cells carrying a *AGP1-lacZ* reporter gene (strain ZLY1939) were transformed with control vector pRS416, *HA-SSY5* (pZL840), or non-tagged *SSY5* plasmid (pZL736) and grown in SD medium with or without 0.02% leucine.  $\beta$ -galactosidase activity assay was carried out as described in Materials and methods

## Tables

Strains used.

| Strain  | Genotype                                                                                                   | Source/Reference |
|---------|------------------------------------------------------------------------------------------------------------|------------------|
| ZLY2879 | <i>MATa ura3 PTR3-myc::kanMX4</i>                                                                          | This study       |
| ZLY2902 | <i>MATa ura3 STP1-HA::kanMX4</i>                                                                           | This study       |
| ZLY1917 | <i>MATa ura3-52 ptr3-<math>\Delta</math>15 AGP1::AGP1-lacZ::kanMX4</i>                                     | This study       |
| ZLY044  | <i>MATa ura3-52 AGP1::AGP1-lacZ::kanMX4</i>                                                                | This study       |
| ZLY2535 | <i>MATa ura3-52 rts1<math>\Delta</math>::kanMX4</i>                                                        | This study       |
| RBV875  | <i>MATa ura3-52 lys2-<math>\Delta</math>201 ptr3-<math>\Delta</math>15 ssy5<math>\Delta</math>::kanMX4</i> | This study       |
| RBV909  | <i>MATa ura3-52 lys2-<math>\Delta</math>201 ssy5<math>\Delta</math>::kanMX4</i>                            | This study       |
| RBV873  | <i>MATa ura3-52 lys2-<math>\Delta</math>201 ssy1-<math>\Delta</math>13 ssy5<math>\Delta</math>::kanMX4</i> | This study       |
| ZLY1939 | <i>MATa ura3-52 ssy5<math>\Delta</math>::kanMX4 AGP1::AGP1-lacZ::kanMX4</i>                                | This study       |

Plasmids used.

| Plasmid | Description                                                                         | Source/Reference |
|---------|-------------------------------------------------------------------------------------|------------------|
| pZL1949 | pRS416 containing <i>HIS6-PTR3-myc</i> , expressing Ptr3 with a 6xHis tag at the N- | This study       |

|         |                                                                                                                                                                    |            |
|---------|--------------------------------------------------------------------------------------------------------------------------------------------------------------------|------------|
|         | terminal end and a 9xmyc tag inserted between residues 157 and 158 of Ptr3.                                                                                        |            |
| pZL2157 | pRS416 containing <i>HIS6-PTR3(S118A)-myc</i> .                                                                                                                    | This study |
| pZL2147 | pRS416 containing <i>HIS6-PTR3(S228A)-myc</i> .                                                                                                                    | This study |
| pZL2265 | pRS416 containing <i>HIS6-PTR3(S353A)-myc</i> .                                                                                                                    | This study |
| pZL2261 | pRS416 containing <i>HIS6-PTR3(S421A)-myc</i> .                                                                                                                    | This study |
| pZL2269 | pRS416 containing <i>HIS6-PTR3(T435A)-myc</i> .                                                                                                                    | This study |
| pZL1668 | pRS416 containing <i>SSY5-HA</i> , expressing Ssy5 with a 3x HA tag at the C-terminal end.                                                                         | This study |
| pZL2340 | pRS417 ( <i>CEN LYS2</i> ) containing <i>SSY5-HA</i> , expressing Ssy5 with a 3x HA tag at the C-terminal end.                                                     | This study |
| pZL1949 | pRS416 containing <i>HIS6-PTR3-myc</i> , expressing Ptr3 with a 9xmyc tag inserted between residues 157 and 158 of Ptr3 and a 6x HIS tag between residues 1 and 2. | This study |
| pZL2122 | pRS416 containing <i>HIS6-PTR3(T525A)-myc9</i> .                                                                                                                   | This study |
| pZL840  | pRS416 containing <i>HA-SSY5</i> , expressing Ssy5 with a 6x HA tag at the N-terminal end.                                                                         | This study |
| pZL736  | pRS416 containing <i>SSY5</i> .                                                                                                                                    | This study |

### Supplemental References

1. **Liu, Z., M. Spirek, J. Thornton, and R. A. Butow.** 2005. A novel degron-mediated degradation of the RTG pathway regulator, Mks1p, by SCFGrr1. *Mol Biol Cell* **16**:4893-904.
